P5992

**Why aortic valve disease may persist after surgery? A joint basic science - Clinical effort**J. Petersen<sup>1</sup>, B. Kloth<sup>1</sup>, N. Grammatika-Pavlidou<sup>2</sup>, T. Eschenhagen<sup>3</sup>, H. Reichenspurner<sup>1</sup>, V.O. Nikolaev<sup>2</sup>, T. Christ<sup>3</sup>, C.E. Molina<sup>2</sup>, E. Girdauskas<sup>1</sup><sup>1</sup>University Heart Center Hamburg, Hamburg, Germany; <sup>2</sup>University Medical Center Hamburg Eppendorf, Institute of Experimental Cardiovascular Research, Hamburg, Germany; <sup>3</sup>University Medical Center Hamburg Eppendorf, Department of Experimental Pharmacology and Toxicology, Hamburg, Germany

**Background:** Diseases of the aortic valve are a common reason for heart surgery. Aortic stenosis (AS) is associated with pressure and aortic regurgitation (AR) with a volume overload of the left ventricle (LV). Over time both pathologies lead to systolic and diastolic heart failure, while progressive downregulation of  $\beta$ -adrenoceptors occurs. While LV re-modeling occurs in the majority of patients after aortic valve surgery, LV dysfunction persists in one fourth of such patients and leads to a terminal heart failure. We aimed to investigate whether differential remodeling in the protein kinase A (PKA) dependent inotropic response in myocytes and myocardial tissue obtained from patients undergoing aortic valve surgery is associated with the LV re-modeling after surgery.

**Methods:** Preoperatively, pro BNP levels were measured and left ventricular strain analysis via echocardiography was performed. Interventricular septal biopsy was obtained intraoperatively in 10 patients who underwent aortic valve surgery. In-vitro contractility was analyzed in myocardial tissue paced with 4 Hz at 37 °C. Freshly isolated cells were transduced with an adenovirus expressing a cytosolic Förster resonance energy transfer

(FRET) based cAMP biosensor (Epac1-camps). After 48 hours of culture, Förster-resonance energy transfer (FRET) was used for the first time to measure cAMP in 60 isolated human ventricular myocytes. Isoprenaline (10 nM – 10  $\mu$ M) was used for  $\beta$ -adrenoceptor activation and forskolin (10  $\mu$ mol) to activate adenylyl cyclase directly.

**Results:** We found a significantly downregulated  $\beta$ -adrenergic sensitivity in cardiomyocytes of patients with aortic valve disease, although contractile response to forskolin was maintained. Furthermore, we found a clear association between reduced sensitivity to isoprenaline (i.e., high EC50 values) and low maximum effect size to isoprenaline in myocardial tissue of patients with aortic valve disease, pointing out relevant  $\beta$ -adrenoceptor dysfunction. There were no significant differences in basal myocardial force between tissue samples of patients with AR and AS.

**Conclusion:** Collectively, our data show a profound remodelling in the cAMP/PKA pathway in patients with aortic valve disease. These disturbances may have an impact on the postoperative ventricular function and possibly on the long-term LV re-modelling after aortic valve surgery.
